# Age-related trends in amyloid positivity in Parkinson's disease without dementia

Keiko Hatano<sup>1</sup>, Masashi Kameyama<sup>2,3</sup>, Masanori Kurihara<sup>1</sup>, Kensuke Ohse<sup>3</sup>, Ryoji Goto<sup>4</sup>, Ryoko Ihara<sup>1</sup>, Mana Higashihara<sup>1</sup>, Renpei Sengoku<sup>5</sup>, Yasushi Nishina<sup>1</sup>, Kazutomi Kanemaru<sup>1</sup>, Yuko Saito<sup>6</sup>, Shigeo Murayama<sup>1,6,7</sup>, Atsushi Iwata<sup>1</sup>

<sup>1</sup>Department of Neurology, Tokyo Metropolitan Institute for Geriatrics and Gerontology, Tokyo, Japan

<sup>2</sup>AI and Theoretical Image Processing, Research Team for Neuroimaging, Tokyo Metropolitan Institute for Geriatrics and Gerontology, Tokyo, Japan

<sup>3</sup>Integrated Research Initiative for Living Well with Dementia, Tokyo Metropolitan Institute for Geriatrics and Gerontology, Tokyo, Japan

<sup>4</sup>Department of Neurology, The University of Tokyo Hospital, Tokyo, Japan

<sup>5</sup>Department of Neurology, The Jikei University School of Medicine, Tokyo, Japan

<sup>6</sup>Department of Neuropathology (The Brain Bank for Aging Research), Tokyo Metropolitan Institute for Geriatrics and Gerontology, Tokyo, Japan

<sup>7</sup>Brain Bank for Neurodevelopmental, Neurological and Psychiatric Disorders, United Graduate School of Child Development, Osaka University, Osaka, Japan

**Correspondence to:** Masashi Kameyama; email: [kame-tyk@umin.ac.jp](mailto:kame-tyk@umin.ac.jp)

**Keywords:** amyloid positivity, Parkinson's disease without dementia, cerebrospinal fluid A $\beta$ 42

**Received:** October 2, 2024

**Accepted:** July 24, 2025

**Published:** August 6, 2025

**Copyright:** © 2025 Hatano et al. This is an open access article distributed under the terms of the [Creative Commons Attribution License](https://creativecommons.org/licenses/by/4.0/) (CC BY 4.0), which permits unrestricted use, distribution, and reproduction in any medium, provided the original author and source are credited.

## ABSTRACT

Amyloid-beta (A $\beta$ ) plays a pivotal role in cognitive decline in Parkinson's disease (PD). The prevalence of amyloid positivity, evaluated using the cerebrospinal fluid (CSF) of patients with PD without dementia in their sixties, is lower than that in individuals with normal cognition without PD diagnosis in the same age range. However, it is unclear whether this is also the case in patients with PD without dementia in their eighties. Eighty-nine patients with PD without dementia were retrospectively classified into two groups with a cut-off age of 73 years at diagnosis: a HIGH group and a LOW group, with mean age at diagnosis of 80.2 and 64.9 years, respectively. The prevalence of amyloid positivity was significantly higher in the HIGH (30.6%) than in the LOW group (10.0%) ( $p = 0.02$ ). The prevalence of amyloid positivity in both groups was lower than that in participants with normal cognition in the same age range. Our findings may be attributed to the shorter preclinical stage of asymptomatic cerebral A $\beta$  deposition in PD, resulting from A $\beta$  accelerating the transition from the asymptomatic to dementia stage. We believe that our findings will incentivize further studies to identify the best disease-modifying therapy for early PD without dementia.

## INTRODUCTION

Amyloid-beta plays a pivotal role in cognitive decline in Lewy body (LB) disease. Neuropathological studies have shown that the amyloid burden in the central nervous system is more strongly correlated with the development of dementia than  $\alpha$ -synuclein pathology

both in Parkinson's disease (PD) with dementia (PDD) and dementia with Lewy bodies (DLB) [1–3]. Marked amyloid deposition in patients with PDD is associated with a rapid rate of cognitive decline [4]. Aside from amyloid-beta, multiple proteinopathies, including tau [5, 6],  $\alpha$ -synuclein [7], TAR-DNA-binding protein 43 (TDP-43) [8], and vasculopathy [9] have been

implicated in the pathogenesis of cognitive impairment in Lewy body disease (LBD). However, in an era when anti-amyloid-beta antibodies have been implemented as disease-modifying therapies for Alzheimer's disease (AD), amyloid-beta remains a crucial protein of interest. The amyloid-beta concentration of cerebrospinal fluid (CSF) has robust prognostic value for cognitive decline in both PD [10–12] and DLB [13]. Thus, CSF profiles are valuable in evaluating amyloid positivity and may also be useful in selecting patients with PD who are eligible for early disease-modifying therapy.

The prevalence of PD increases approximately 10-fold between the ages of 50 and 80 years [14]. The number of patients who will be diagnosed with PD in their eighties is predicted to increase in our aging society. Previous clinicopathological studies have shown rapid progression in motor symptoms [15, 16] and earlier dementia development in patients with PD onset  $\geq$  80 years than that in patients with earlier PD onset [15]. However, antemortem amyloid positivity in patients with PD without dementia in their eighties at diagnosis has not yet been reported.

The prevalence of amyloid positivity in patients with PD without dementia is lower among patients in their sixties than individuals with normal cognition and no diagnosis of PD (hereinafter referred to as individuals with normal cognition) in the same age range [17, 18]. However, it remains unclear whether this is also the case in patients with PD without dementia in their eighties.

We aimed to determine the prevalence of amyloid positivity using CSF profiles in patients with PD without dementia who were in their eighties at diagnosis by applying the CSF AD biomarkers to the AT(N) classification [19].

## RESULTS

The patients' characteristics are shown in Table 1. The percentage of patients with normal cognition was 91.8% and 95.0% in the HIGH and LOW groups, respectively. All apolipoprotein E (ApoE)  $\epsilon$ 4 carriers had one  $\epsilon$ 4 allele. Quantile-quantile plots of A $\beta$ 42 levels as a representative of approximately normally distributed data are presented in Supplementary Figure 1.

No significant difference was observed in any clinical or imaging parameter between the two groups, except the Mini-Mental State Examination (MMSE) scores and education years. The MMSE scores were significantly lower in the HIGH than in the LOW group ( $27.1 \pm 2.0$  vs.  $28.3 \pm 1.8$ ,  $p = 0.01$ ). Years of education were significantly lower in the HIGH than in the LOW group

( $11.8 \pm 2.8$  vs.  $14.1 \pm 3.2$ ,  $p = 0.003$ ). To evaluate the relationship between aging and education years or MMSE scores in each AT(N) category, we conducted Welch's t-test comparing the HIGH vs. LOW group for education years and MMSE scores within each AT(N) category in Supplementary Table 1A. No significant differences were observed between the HIGH and LOW group in the AD continuum category for both education years and MMSE scores.

CSF amyloid-beta 42 (A $\beta$ 42) levels (pg/mL) and age at diagnosis showed a negative correlative tendency ( $r = -0.19$ ,  $p = 0.08$ ) (Figure 1A), and CSF tau phosphorylated at threonine 181 (p-tau) levels (pg/mL) and age at diagnosis (Figure 1B) showed a positive correlative tendency ( $r = 0.20$ ,  $p = 0.06$ ). Conversely, CSF total-tau (t-tau) levels (pg/mL) and age at diagnosis were significantly positively correlated ( $r = 0.35$ ,  $p < 0.001$ ) (Figure 1C). The association between age at diagnosis and each AT(N) category for CSF A $\beta$ 42, p-tau, and t-tau is shown in Figure 1D–1F, respectively. Pearson's correlation coefficient was not calculated for the non-Alzheimer's (non-AD) pathologic change category due to the small number of cases. CSF A $\beta$ 42 and age at diagnosis showed negative correlative tendency ( $r = -0.36$ ,  $p = 0.13$ ) in the AD continuum category, whereas this tendency was not evident in the normal category ( $r = 0.08$ ,  $p = 0.54$ ) (Figure 1D). CSF p-tau and age at diagnosis showed a significant positive correlation in the AD continuum category ( $r = 0.48$ ,  $p = 0.04$ ), but showed no obvious tendency in the normal category (Figure 1E). CSF t-tau and age at diagnosis showed a significant positive correlation in both patients in AD continuum category ( $r = 0.53$ ,  $p = 0.02$ ) and normal category ( $r = 0.48$ ,  $p < 0.001$ ) (Figure 1F).

The prevalence of amyloid positivity, that is, AD continuum, in both groups is shown in Table 2. The prevalence of amyloid positivity was significantly higher in the HIGH (30.6%) than in the LOW group (10.0%) (95% confidence interval, 1.10–17.8; odds ratio, 3.91; and  $p = 0.02$ ), as determined by Fisher's exact test.

The clinical data of each AT(N) biomarker category are shown in Supplementary Table 1A. Age at diagnosis, disease duration (months), education years, MMSE scores, mild cognitive impairment (MCI) prevalence, and ApoE  $\epsilon$ 4 allele did not differ significantly in any pairwise comparisons of the three categories in each group. Specifically, to evaluate the relationship between the numbers of MCI and AT(N) categories, we conducted Fisher's exact tests using Supplementary Table 1B for the HIGH group and Supplementary Table 1C for the LOW group, yielding  $p$ -values of 1.00 and

**Table 1. Clinical characteristics of the patients.**

|                                                                                | HIGH group<br>(N = 49) | LOW group<br>(N = 40) | p-<br>value | Missing data, n (%) |              | test* |
|--------------------------------------------------------------------------------|------------------------|-----------------------|-------------|---------------------|--------------|-------|
|                                                                                |                        |                       |             | HIGH<br>group       | LOW<br>group |       |
| Age at diagnosis and LP (y)                                                    | 80.2 (± 4.4)           | 64.9 (± 7.3)          |             | 0                   | 0            |       |
| Age at onset (y)                                                               | 79.0 (± 4.6)           | 63.4 (± 7.6)          |             | 0                   | 0            |       |
| Disease duration at diagnosis (m)                                              | 18.1 (± 13.9)          | 21.0 (± 15.0)         | 0.40        | 0                   | 0            | a     |
| The interval between <sup>123</sup> I-ioflupane SPECT and LP (m)               | 2.6 (± 9.4)            | 4.8 (± 10.7)          | 0.33        | 0                   | 0            | a     |
| Male, n (%)                                                                    | 21 (42.9%)             | 18 (45.0%)            | 1.00        | 0                   | 0            | b     |
| ApoE ε4 allele carriers, n (%)                                                 | 10 (21.7%)             | 5 (14.3%)             | 0.57        | 3 (6.1%)            | 5 (12.5%)    | b     |
| Motor symptoms                                                                 |                        |                       |             |                     |              |       |
| Hoehn-Yahr score                                                               | 2.4 (± 0.7)            | 2.4 (± 0.8)           | 0.64        | 0                   | 0            | a     |
| bradykinesia, n (%)                                                            | 49 (100.0%)            | 40 (100.0%)           | 1.00        | 0                   | 0            | b     |
| rigidity, n (%)                                                                | 44 (89.8%)             | 38 (95.0%)            | 0.45        | 0                   | 0            | b     |
| resting tremor, n (%)                                                          | 24 (49.0%)             | 21 (52.5%)            | 0.83        | 0                   | 0            | b     |
| recurrent falls, n (%)                                                         | 8 (16.3%)              | 8 (20.0%)             | 0.78        | 0                   | 0            | b     |
| gait freezing or festination, n (%)                                            | 10.0 (20.4%)           | 6 (15.0%)             | 0.59        | 0                   | 0            | b     |
| Non-motor symptoms                                                             |                        |                       |             |                     |              |       |
| Presence of at least one non-motor symptom, n (%)                              | 38 (77.6%)             | 34 (85.0%)            | 0.43        | 0                   | 0            | b     |
| Autonomic nervous function                                                     |                        |                       |             |                     |              |       |
| Orthostatic hypotension, n (%)                                                 | 19 (42.2%)             | 19 (50.0%)            | 0.38        | 4 (8.2%)            | 4 (10.0%)    | b     |
| <sup>123</sup> I-MIBG myocardial scintigraphy positivity, n (%)                | 28 (59.6%)             | 22 (59.5%)            | 1.00        | 2 (4.1%)            | 3 (7.5%)     | b     |
| The interval between <sup>123</sup> I- MIBG myocardial scintigraphy and LP (m) | 2.8 (± 12.1)           | 1.9 (± 6.1)           | 0.58        | 2 (9.1%)            | 3 (6.1%)     | a     |
| Psychiatric symptoms                                                           |                        |                       |             |                     |              |       |
| GDS scores ≥6, n (%)                                                           | 9 (22.0%)              | 10 (37.0%)            | 0.27        | 8 (16.3%)           | 13 (32.5%)   | b     |
| Cognitive function-related data                                                |                        |                       |             |                     |              |       |
| Education (y)                                                                  | 11.8 (± 2.8)           | 14.1 (± 3.2)          | 0.003**     | 13 (26.5%)          | 12 (30.0%)   | a     |
| MMSE scores                                                                    | 27.1 (± 2.0)           | 28.3 (± 1.8)          | 0.014*      | 8 (16.3%)           | 8 (20.0%)    | a     |
| Normal cognition, n (%)                                                        | 45 (91.8%)             | 38 (95.0%)            | 0.69        | 0                   | 0            | b     |
| Comorbidity                                                                    |                        |                       |             |                     |              |       |
| Diabetes mellitus, n (%)                                                       | 4 (8.2%)               | 3 (7.5%)              | 1.00        | 0                   | 0            | b     |

HIGH group = patients aged ≥ 73 at diagnosis, LOW group = patients aged < 73 at diagnosis, LP = lumbar puncture, y = years, m = months, SPECT = single-photon emission computerized tomography, MIBG = meta-iodobenzyl-guanidine myocardial, GDS = geriatric depression scale, MMSE = mini-mental state examination, MCI = mild cognitive impairment, ApoE = Apolipoprotein E, \*\* =  $p < 0.01$ , \* =  $p < 0.05$ . P-values represent the result of Welch's t-test or Fisher's exact test. \*test a = Welch's t-test, b = Fisher's exact test.

0.36, respectively. Of the six patients with MCI, the AT(N) profiles of two MCI patients who were not in the normal category were as follows: A+T-(N)- in the patient in the AD continuum category in the HIGH

group and A-T-(N)+ in the other patient in the non-AD pathologic change category in the LOW group. Among the six MCI patients, the normal category in the HIGH group included one ApoE ε4 allele carrier.

## DISCUSSION

The prevalence of amyloid positivity in the HIGH group was 30.6%, which was significantly higher than the 10.0% in the LOW group (Table 2). To the best of our knowledge, this is the first study to demonstrate the prevalence of amyloid positivity using the CSF profiles of patients with early PD without dementia with a mean age of 80.2 years at diagnosis.

Regarding the clinical characteristics of the patients in the two groups (Table 1) including positivity in  $^{123}\text{I}$ -MIBG scintigraphy, we inferred that PD severity did not differ significantly between the two groups. This allowed us to observe age-related differences in the

prevalence of amyloid positivity in PD. The significantly lower MMSE scores in the HIGH group compared to the LOW group may have been affected by age and the significant difference in years of education between the two groups [20], though there were missing data on education years.

In previous studies, the motor and non-motor symptoms in patients with PD  $\geq 70$  (mean: 74.3) years at onset were significantly more severe compared to those in their younger counterparts [21]. The risk of axial symptoms reportedly increases in patients aged  $\geq 70$  years at PD diagnosis [22]. The discrepancy between previous results and ours may be attributed to the heterogeneity in the study cohorts and methodology.

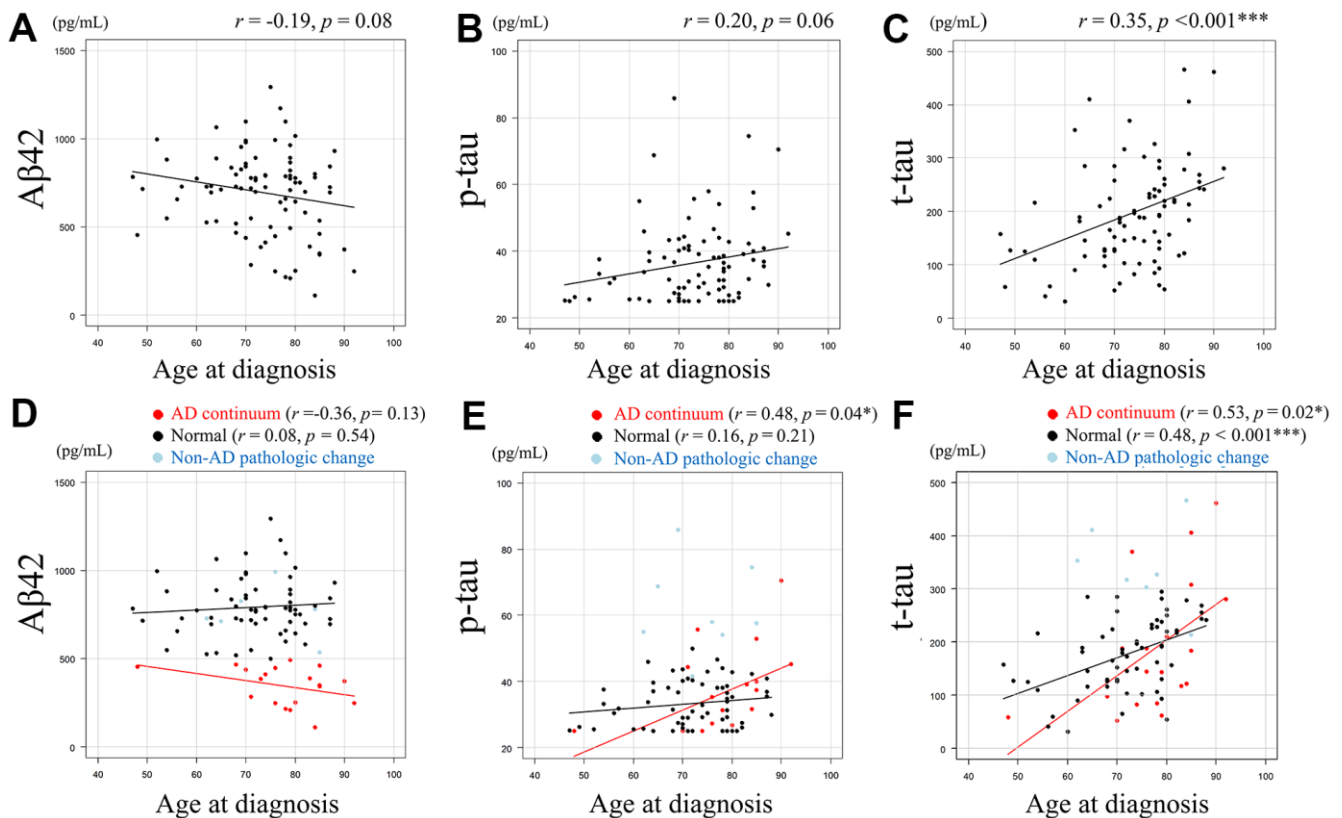

**Figure 1. Relationship between Aβ42, p-tau, or t-tau levels and age at diagnosis.** Scatter plots demonstrate the relationship between age at diagnosis and CSF biomarkers. Least squares regression lines are included where Pearson's correlation analysis was performed. A negative correlative tendency ( $r = -0.19, p = 0.08$ ) was observed between CSF Aβ42 levels (pg/mL) and age at diagnosis. (A) A positive correlative tendency ( $r = 0.20, p = 0.06$ ) was observed between CSF p-tau levels (pg/mL) and age at diagnosis. (B) Significant positive correlation was observed between CSF t-tau levels (pg/mL) and age at diagnosis ( $r = 0.35, p < 0.001$ ). (C) The association between age at diagnosis and each AT(N) category for CSF Aβ42, p-tau, and t-tau are shown. (D–F), with Pearson's correlation coefficient not calculated for the non-AD category due to the small number of cases. CSF Aβ42 and age at diagnosis showed negative correlative tendency ( $r = -0.36, p = 0.13$ ) in the AD continuum category, whereas this tendency was not evident in the normal category ( $r = 0.08, p = 0.54$ ). (D) CSF p-tau and age at diagnosis showed a significant positive correlation in the AD continuum category ( $r = 0.48, p = 0.04$ ), but showed no obvious tendency in the normal category. (E) CSF t-tau and age at diagnosis showed a significant positive correlation in both patients in AD continuum category ( $r = 0.53, p = 0.02$ ) and normal category ( $r = 0.48, p < 0.001$ ). (F) Data in AD continuum category are plotted in red, normal category in black, and non-AD pathologic change category in light blue (D–F). Aβ42 = amyloid-beta 42, p-tau = phosphorylated tau, t-tau = total tau, \* =  $p < 0.05$ , \*\*\* =  $p < 0.001$ .  $r$  and  $p$  represent Pearson's correlation and significance, respectively.

**Table 2. Comparison of the prevalence of amyloid positivity between the two groups.**

|                           | HIGH group (N = 49) | LOW group (N = 40) | Odds ratio | 95%CI     | p-value |
|---------------------------|---------------------|--------------------|------------|-----------|---------|
| Amyloid positivity, n (%) | 15 (30.6%)          | 4 (10.0%)          | 3.91       | 1.10–17.8 | 0.02*   |

HIGH group = patients aged  $\geq 73$  at diagnosis, LOW group = patients aged  $< 73$  at diagnosis, CI = confidence interval, \* =  $p < 0.05$ . P-values represent the result of Fisher's exact test.

In this study, the age at diagnosis was slightly older than that in previous studies, in which patients with dementia were excluded.

The prevalence of amyloid positivity (10.0%) in the LOW group (mean age: 64.9 years) was similar to those reported by previous studies among patients with PD without dementia in the same age range (Table 3). Among patients with PD without dementia in their sixties, the prevalence of amyloid positivity is  $\leq 10\%$  [17, 18]. Specifically, one study reported a prevalence of 10% in patients with a median age of 61.0 years using the CSF A $\beta$ 42/A $\beta$ 40 ratio [18]. The other study reported a prevalence of 0% in patients with a mean age of 68.8 years using amyloid positron emission tomography (PET) [17] (Table 3).

The prevalence of amyloid positivity (30.6 %) in both the LOW and HIGH groups (mean age: 80.2 years) was lower than that in participants with normal cognition in the same age range (Table 3). In participants with normal cognition, the prevalence of amyloid positivity increases with age [23–25] and ranges from 20% [25, 26] to 40% [27] in participants aged approximately 60 and 80 years, respectively, based on evaluations using CSF A $\beta$ 42 [25, 26] or amyloid PET [25, 26] (Table 3). The finding that amyloid positivity prevalence was lower in patients with PD without dementia than that in participants with normal cognition in the same age range could be discussed as follows. Although experimental findings are not always consistent and the interactions between A $\beta$ ,  $\alpha$ -synuclein, and tau remain controversial, several studies have reported interactions between A $\beta$  and either  $\alpha$ -synuclein or tau. Hybrid oligomers of A $\beta$  and  $\alpha$ -synuclein have been identified in the brains of patients with AD and DLB patients, as well as in amyloid precursor protein/ $\alpha$ -synuclein transgenic mice, suggesting a direct interaction between the two [28]. In a mouse model of LBD, A $\beta$  plaques promoted the seeding and propagation of  $\alpha$ -synuclein and tau [29], which has been supported by *in vitro* studies showing co-aggregation and direct binding between A $\beta$  and  $\alpha$ -synuclein [30, 31]. Based on these findings, our results may be attributed to the shorter preclinical stage of asymptomatic cerebral A $\beta$  deposition in PD [17], with A $\beta$  facilitating the transition from the asymptomatic to dementia stage. Conversely,

another study reported that  $\alpha$ -synuclein may inhibit A $\beta$  plaque formation [27], which may also explain our findings. Furthermore, given the reported interactions between  $\alpha$ -synuclein and tau [32–38], it is plausible that these molecular relationships influence the interaction between A $\beta$  and the other proteins.

Our finding of a significant correlation between CSF t-tau levels and age at diagnosis is consistent with a previous result [21]. This finding can be explained by aging-induced axonal damage in the neurons [39] and age-related co-pathologies, such as primary age-related tauopathy (PART) [40], because advanced age increases the risk of multiple pathologies [41]. For example, a patient with Parkinsonism onset at  $\geq 80$  years who underwent autopsy after death at 91 years displayed morphological features of PART in addition to PD [16]. Our observation of a significant correlation between t-tau levels and age at diagnosis, regardless of amyloid positivity or negativity (Figure 1F), supports the idea that age-related t-tau elevation is not mainly caused by the common sequential changes reported in AD, such as decreased CSF A $\beta$ 42, increased CSF p-tau, and neurodegeneration [42, 43].

A significant correlation between p-tau levels and age at diagnosis in patients with amyloid positivity (Figure 1E) was observed. This may be attributable to tau accumulation induced by  $\alpha$ -synuclein [44]. It may also be caused by the increased secretion or reduced clearance of p-tau associated with aging by unrevealed mechanisms in patients with PD with amyloid positivity. Alternatively, it may have been caused by the exclusion of younger patients with high p-tau in the amyloid-positive group from the present study, who may have developed dementia rapidly after amyloid positization [17].

The AT(N) category distribution of the six patients with MCI and an ApoE  $\epsilon$ 4 allele in three categories in each group (Supplementary Table 1A) indicates a weak relationship between MCI and amyloid positivity or presence of an ApoE  $\epsilon$ 4 allele. In this study, we did not reach a conclusion regarding the association between the increased A $\beta$  positivity rate in the HIGH group and clinical manifestations, including MMSE scores.



**Table 3. Previous reports of the prevalence of amyloid positivity in subjects with normal cognition and PD without dementia.**

| Participants                    | Prevalence of amyloid positivity | Age (y) of the participants | Methods                             | Refs |
|---------------------------------|----------------------------------|-----------------------------|-------------------------------------|------|
| In sixties                      |                                  |                             |                                     |      |
| Subjects with normal cognition  | 22.6%                            | 62.5–67.4                   | CSF A $\beta$ 42 or amyloid PET     | [25] |
| Subjects with normal cognition  | 23.0%                            | 67.9 as mean age            | CSF A $\beta$ 42 or amyloid PET     | [26] |
| PD without dementia             | 10.0%                            | 61.0 as median age          | CSF A $\beta$ 42/A $\beta$ 40 ratio | [18] |
| PD without dementia             | 0%                               | 68.8 as mean age            | Amyloid PET                         | [17] |
| This study; PD without dementia | 10.0%                            | 64.9 as mean age            | CSF A $\beta$ 42                    |      |
| In eighties                     |                                  |                             |                                     |      |
| Subjects with normal cognition  | 42.0%                            | 77.5–82.4                   | CSF A $\beta$ 42 or amyloid PET     | [25] |
| This study; PD without dementia | 30.6%                            | 80.2 as mean age            | CSF A $\beta$ 42                    |      |

Subjects with normal cognition = subjects with normal cognition without a diagnosis of Parkinson's disease, PD = Parkinson's disease, y = years, A $\beta$  = amyloid-beta, PET = positron emission tomography, Refs = references.

The underlying pathology of MCI in PD is highly heterogeneous, and this heterogeneity includes different stages of Lewy body pathology, Alzheimer's disease pathology, and cerebral amyloid angiopathy [45–48]. The pattern of cognitive decline is also reported to be heterogeneous, partly due to variations in neuropsychological assessments used across studies [47], leading to inconsistencies in findings [45–47]. However, impairments in attention and executive function are predominant [49], whereas memory deficits tend to be relatively less frequent [50]. Therefore, further research is needed to elucidate the relationship between the underlying mechanisms of PD-MCI and cognitive decline.

CSF A $\beta$ 42 cutoff levels for amyloid positivity vary across the literature, particularly with the INNOTEST® assay (Supplementary Table 2), and prevalence of amyloid positivity varies depending on the cutoff levels (Supplementary Table 3A, 3B). However, our cutoff level is pathology-based, and its validity is supported by the previous studies [51, 52] originating from our institution. In addition, the median (interquartile range) cutoff level among the 30 studies excluding ours in Supplementary Table 2 was 530.2 (452.2–550.0) pg/mL, and three studies adopted the same 500 pg/mL threshold as ours, suggesting that the chosen cutoff aligns with prior studies.

Regardless of the type of biofluid assay or imaging modality used, diagnostic uncertainty exists for values near the cutoff point [53]. When CSF A $\beta$ 42 or A $\beta$ 42/A $\beta$ 40 and amyloid burden measured by amyloid PET are treated as binary data, they show high concordance and are frequently used in clinical practice. However, when analyzed as continuous data, particularly at high levels of amyloid burden, these

measures are not interchangeable [54]. Therefore, treating these measures as continuous variables is expected to provide more accurate and deeper insights into the relationships among amyloid accumulation, neuronal loss, and cognitive decline.

The limitations of this study are as follows. First, neuropathological evaluation and CSF  $\alpha$ -synuclein data were not available. However, PD was diagnosed according to the diagnostic criteria, and the nigro-striatum impairment by dopamine transporter (DAT) single-photon emission computed tomography (SPECT) was confirmed. We believe that the diagnostic accuracy of PD is reasonable. Second, it has been reported that the A $\beta$ 42/40 ratio is better for assessing amyloid positivity [55]; however, data on A $\beta$ 40 were not available. Third, all participants were Japanese, resulting in the limited generalizability of the results to other populations [56]. Fourth, healthy controls were not included, but it is unavoidable in retrospective studies because they do not visit medical institutions. Thus, we referred to data of healthy controls in previous studies. Finally, the sample of patients included was relatively small, which restricts the discussion of the differences among the three categories in each group.

To clarify the causal relationship between A $\beta$  positivity and PD progression, a longitudinal, large-scale, multi-center study is needed. It is essential to verify whether A $\beta$  deposition accelerates dementia onset in PD patients in their eighties, as suggested in our study, similarly to those in their sixties. This requires healthy controls, PD with normal cognition, MCI-LB, and PDD/DLB patients. Comprehensive assessments should cover cognition, motor function, and biomarkers—such as CSF or blood-based  $\alpha$ -synuclein seed amplification assays [57–59], AD biomarkers [53], and PET imaging

including amyloid and tau PET (e.g.,  $^{18}\text{F}$ -MK-6240) [60]. Pathological confirmation, including TDP-43, is also necessary. Ultimately, we must define when, in whom, and which pathological processes to target for disease-modifying therapy to prevent cognitive decline in LBD.

In conclusion, we elucidated the prevalence of amyloid positivity in patients with PD without dementia, whose mean age at diagnosis was 80.2 years, using CSF A $\beta$ 42 levels. We believe that our findings will incentivize further studies to identify the best disease-modifying therapy for early PD without dementia.

## MATERIALS AND METHODS

### Participants and clinical protocol

This study was approved by the Institutional Review Board of the Tokyo Metropolitan Institute for Geriatrics and Gerontology. Written informed consent was obtained from all participants or next of kin. We retrospectively evaluated consecutive patients who had been diagnosed with PD based on the UK Parkinson's Disease Society Brain Bank clinical diagnostic criteria [61] at the Tokyo Metropolitan Institute for Geriatrics and Gerontology between April 2013 and December 2022. The data were accessed from April 28, 2023. Although the authors had access to information that could identify individual participants during or after data collection, all personal information was anonymized and properly protected.

During hospitalization for < 1 week, patients were diagnosed with PD based on clinical history and neurological examination. During the same period, patients underwent examination of cognitive function and orthostatic hypotension (OH), followed by CSF acquisition before administration of dopaminergic agents to confirm the diagnosis.

We included idiopathic PD patients who were diagnosed within 5 years from the onset of a motor symptom, patients with normal cognitive function or MCI [62] (MMSE score  $\geq 24$ ), and patients with DAT binding deficit on  $^{123}\text{I}$ -ioflupane SPECT imaging. Exclusion criteria were dementia; family history of one or more individuals with PD; PD onset at < 40 years; anti-parkinsonian drugs or anti-depressants, such as sulpiride or mirtazapine [63]; and no improvement in motor symptoms after dopaminergic medication. All patients underwent brain magnetic resonance imaging (MRI); patients whose MRI suggested other neurodegenerative diseases, acute or subacute stroke, cerebral amyloid angiopathy [64], or idiopathic normal pressure hydrocephalus were excluded.

Patients were divided into two groups according to age at diagnosis:  $\geq 73$  or < 73 years old comprised the HIGH and LOW groups, respectively. The justification for 73 as a cut-off age is that the mean age of the older group was approximately 80, the age range we intended to observe, and the numbers of patients in the two groups were relatively balanced at this cut-off, which ensured adequate statistical power.

The following data were investigated: age; disease duration at diagnosis; sex; Hoehn–Yahr scores [65]; presence of motor symptoms such as bradykinesia, rigidity, resting tremor, recurrent falls (> once/year), gait freezing, or festination; presence of at least one non-motor symptom such as sleep disorder (sleep-maintenance insomnia or possibility of rapid eye movement sleep behavior disorder (RBD) evaluated by scores  $\geq 5$  on the Japanese version of the RBD screening questionnaire [66]); autonomic nervous disorders (constipation, daytime urinary urgency, or symptomatic orthostasis); subjective or objective olfactory disturbance as evaluated using the odor stick identification test for Japanese (scores  $\geq 8$ ) [67–69]; psychiatric dysfunction (depression or anxiety); OH defined as a decrease in systolic blood pressure by  $\geq 20$  mmHg during head-up tilt for 10 min;  $^{123}\text{I}$ -meta-iodobenzyl-guanidine (MIBG) myocardial scintigraphy positivity; Geriatric Depression Scale scores ( $\geq 6$ ); education years; MMSE score; ApoE phenotyping; and diabetes mellitus.

To elucidate the AT(N) biomarker profiles of AD in patients with PD, we measured A $\beta$ 42, p-tau, and t-tau in CSF. According to the AT(N) biomarker profiles, we counted the number of patients in the three biomarker categories: normal, Alzheimer's continuum (AD continuum), and non-AD pathologic change in the two groups.

### $^{123}\text{I}$ -ioflupane single-photon emission computed tomography assessment

All  $^{123}\text{I}$ -ioflupane SPECT data were obtained at the Tokyo Metropolitan Institute for Geriatrics and Gerontology. Detailed methods of acquisition of DAT SPECT imaging and calculation of the specific binding ratio (SBR) of the striatal DAT binding using the DAT VIEW software (Nihon Medi-Physics, Co., Ltd, Tokyo, Japan) have been described previously [70]. Positivity was determined based on the mean value of the left and right SBRs < 95% of the lower limit of the prediction interval [71].

### $^{123}\text{I}$ -meta-iodobenzyl-guanidine myocardial scintigraphy assessment

All  $^{123}\text{I}$ -MIBG myocardial scintigraphy data were obtained at the Tokyo Metropolitan Institute for

Geriatrics and Gerontology. 111 MBq  $^{123}\text{I}$ -MIBG (PDR Pharma Co., Ltd, Tokyo, Japan) was injected intravenously, and early and delayed images were obtained with a delay of 15–30 min and 3–4 h, respectively. The heart-to-mediastinum (H/M) ratio and washout rate were calculated as described previously [72]. The respective cutoff values for the widely used H/M ratio and washout rate were 2.20 and 34%, respectively [73, 74]. Positivity was determined based on the presence of at least one of the following: the H/M ratio in the early or delay phase was  $< 2.20$  or the washout rate was  $> 34\%$ .

### Cerebrospinal fluid analysis

CSF was obtained via lumbar puncture. The first 2 mL of CSF was used for routine examination, and the remaining CSF was directly collected in polypropylene tubes and stored at  $-30^{\circ}\text{C}$  until analysis, which was conducted within 2 months.

The CSF concentrations of A $\beta$ 42, p-tau, and t-tau were measured using enzyme-linked immunosorbent assay (INNOTEST®, Fujirebio Inc., Gent, Belgium), in accordance with the manufacturer's protocol, as described previously [52, 75]. The lower detection limit of CSF p-tau was 25.0 pg/mL.

To apply the CSF AD biomarkers to the AT(N) classification [19], we defined the biomarker of A $\beta$  plaques (labeled “A”), fibrillary tau (labeled “T”), and neurodegeneration (labeled “N”) as follows using predetermined institutional cut-off values [75, 76]: A+ indicated A $\beta$ 42  $< 500$  pg/mL, T+ indicated p-tau  $> 50.0$  pg/mL, and N+ indicated t-tau  $> 300$  pg/mL. The A $\beta$ 42 cutoff level was pathology-based, and its validity is supported by our previous reports [51, 52].

Categorization in the AD continuum category was indicative of amyloid positivity. To evaluate the correlation between A $\beta$ 42, p-tau, or t-tau levels and age at diagnosis, we conducted Pearson's correlation analysis. To further examine the influence of the amyloid positivity on p-tau or t-tau levels, we examined the relationship between p-tau or t-tau levels and age at diagnosis in patients in two groups based on A $\beta$ 42 positivity categorized as “AD continuum” or A $\beta$ 42 negativity categorized as “normal” excluding the patients in the “non-AD pathologic change category”.

### Apolipoprotein E phenotyping

ApoE phenotyping was performed using isoelectric focusing, followed by Western blotting.

### Statistics

Contingency table analysis was conducted using Fisher's exact test. Continuous variables are presented as the mean  $\pm$  standard deviation (SD) and compared using Welch's t-test for comparison of means between two groups, or compared using one-way ANOVA for pairwise comparisons of means between two of three groups, followed by *post hoc* analyses using a Tukey's Honest Significant Difference test. Pearson's correlation analysis was conducted to determine the relationship between age at diagnosis and other continuous variables. Statistical significance was set at  $p < 0.05$ . Statistical analyses were conducted using R version 4.1.2 (R Foundation for Statistical Computing, Vienna, Austria) and EZR (Saitama Medical Center, Jichi Medical University, Saitama, Japan) [77]. Missing data were handled using the pairwise deletion approach.

### Abbreviations

A $\beta$ 42: amyloid-beta 42; AD: Alzheimer's disease; AD continuum: Alzheimer's continuum; ApoE: Apolipoprotein E; CSF: cerebrospinal fluid; DAT: dopamine transporter; DLB: dementia with Lewy bodies; H/M ratio: heart-to-mediastinum ratio; LB: Lewy body; MCI: mild cognitive impairment; MIBG: meta-iodobenzyl-guanidine; MMSE: Mini-Mental State Examination; MRI: magnetic resonance imaging; OH: orthostatic hypotension; PART: primary age-related tauopathy; PD: Parkinson's disease; PDD: Parkinson's disease with dementia; PET: positron emission tomography; p-tau: tau phosphorylated at threonine 181; RBD: rapid eye movement sleep behavior disorder; SBR: specific binding ratio; SPECT: single-photon emission computed tomography; t-tau: total-tau.

### AUTHOR CONTRIBUTIONS

K.H., M. Kameyama, M. Kurihara, R.I., K.K., and A.I. contributed to the study conception and design. Data acquisition, analysis, and interpretation were performed by all authors. The first draft of the manuscript was written by K.H., and all authors commented on following versions of the manuscript. All authors read and approved the final manuscript.

### ACKNOWLEDGMENTS

We would like to thank all the patients and their families for participating in this study. We also thank the members of the Department of Neurology for their support, and the Department of Diagnostic Radiology for their technical assistance.



## CONFLICTS OF INTEREST

The authors have no conflicts of interest to declare.

## ETHICAL STATEMENT AND CONSENT

This study protocol was approved by the Institutional Review Board of the Tokyo Metropolitan Institute for Geriatrics and Gerontology, approval number R23-004 and was performed in accordance with the ethical standards of the 1964 Declaration of Helsinki and its later amendments. Written informed consent was obtained from all participants. For patients with cognitive impairment, written informed consent was obtained from their legal guardians.

## FUNDING

This study was supported by Intramural Research Grants from Tokyo Metropolitan Geriatric Hospital (M. Kurihara, K. Kanemaru), Research Grant from Integrated Research Initiative for Living Well with Dementia (M. Kameyama), and AMED under Grant No. 23dk0207048 and 23dk0207057 (A. Iwata). This study was supported by JSPS KAKENHI Grant Numbers JP 22H04923 (CoBiA) (Y. Saito and S. Murayama), Grants-in Aid from the Research Committee of CNS Degenerative Diseases, Research on Policy Planning and Evaluation for Rare and Intractable Diseases, Health, Labour and Welfare Sciences Research Grants, the Ministry of Health, Labour and Welfare, Japan, Grant No. 20FC1049 (Y. Saito) and AMED JP21wm0425019 (Y. Saito and S. Murayama).

## REFERENCES

1. Compta Y, Parkkinen L, O'Sullivan SS, Vandrovcova J, Holton JL, Collins C, Lashley T, Kallis C, Williams DR, de Silva R, Lees AJ, Revesz T. Lewy- and Alzheimer-type pathologies in Parkinson's disease dementia: which is more important? *Brain*. 2011; 134:1493–505. <https://doi.org/10.1093/brain/awr031> PMID:21596773
2. Kotzbauer PT, Cairns NJ, Campbell MC, Willis AW, Racette BA, Tabbal SD, Perlmuter JS. Pathologic accumulation of  $\alpha$ -synuclein and A $\beta$  in Parkinson disease patients with dementia. *Arch Neurol*. 2012; 69:1326–31. <https://doi.org/10.1001/archneurol.2012.1608> PMID:22825369
3. Irwin DJ, Hurtig HI. The Contribution of Tau, Amyloid-Beta and Alpha-Synuclein Pathology to Dementia in Lewy Body Disorders. *J Alzheimers Dis Parkinsonism*. 2018; 8:444. <https://doi.org/10.4172/2161-0460.1000444> PMID:30473927
4. Palermo G, Tommasini L, Aghakhanyan G, Frosini D, Giuntini M, Tognoni G, Bonuccelli U, Volterrani D, Ceravolo R. Clinical Correlates of Cerebral Amyloid Deposition in Parkinson's Disease Dementia: Evidence from a PET Study. *J Alzheimers Dis*. 2019; 70:597–609. <https://doi.org/10.3233/JAD-190323> PMID:31256138
5. Coughlin D, Xie SX, Liang M, Williams A, Peterson C, Weintraub D, McMillan CT, Wolk DA, Akhtar RS, Hurtig HI, Branch Coslett H, Hamilton RH, Siderowf AD, et al. Cognitive and Pathological Influences of Tau Pathology in Lewy Body Disorders. *Ann Neurol*. 2019; 85:259–71. <https://doi.org/10.1002/ana.25392> PMID:30549331
6. Coughlin DG, Phillips JS, Roll E, Peterson C, Lobrovich R, Rasovsky K, Ungrady M, Wolk DA, Das S, Weintraub D, Lee EB, Trojanowski JQ, Shaw LM, et al. Alzheimer's Disease Neuroimaging Initiative. Multimodal *in vivo* and postmortem assessments of tau in Lewy body disorders. *Neurobiol Aging*. 2020; 96:137–47. <https://doi.org/10.1016/j.neurobiolaging.2020.08.003> PMID:33002767
7. Winer JR, Maass A, Pressman P, Stiver J, Schonhaut DR, Baker SL, Kramer J, Rabinovici GD, Jagust WJ. Associations Between Tau,  $\beta$ -Amyloid, and Cognition in Parkinson Disease. *JAMA Neurol*. 2018; 75:227–35. <https://doi.org/10.1001/jamaneurol.2017.3713> PMID:29228071
8. Uemura MT, Robinson JL, Cousins KAQ, Tropea TF, Kargilis DC, McBride JD, Suh E, Xie SX, Xu Y, Porta S, Uemura N, Van Deerlin VM, Wolk DA, et al. Distinct characteristics of limbic-predominant age-related TDP-43 encephalopathy in Lewy body disease. *Acta Neuropathol*. 2022; 143:15–31. <https://doi.org/10.1007/s00401-021-02383-3> PMID:34854996
9. Hansen D, Ling H, Lashley T, Foley JA, Strand C, Eid TM, Holton JL, Warner TT. Novel clinicopathological characteristics differentiate dementia with Lewy bodies from Parkinson's disease dementia. *Neuropathol Appl Neurobiol*. 2021; 47:143–56. <https://doi.org/10.1111/nan.12648> PMID:32720329
10. Siderowf A, Xie SX, Hurtig H, Weintraub D, Duda J, Chen-Plotkin A, Shaw LM, Van Deerlin V, Trojanowski JQ, Clark C. CSF amyloid {beta} 1-42 predicts cognitive decline in Parkinson disease. *Neurology*. 2010; 75:1055–61. <https://doi.org/10.1212/WNL.0b013e3181f39a78> PMID:20720189
11. Terrelonge M Jr, Marder KS, Weintraub D, Alcalay RN. CSF  $\beta$ -Amyloid 1-42 Predicts Progression to Cognitive Impairment in Newly Diagnosed Parkinson Disease. *J Mol Neurosci*. 2016; 58:88–92. <https://doi.org/10.1007/s12031-015-0647-x> PMID:26330275

12. Schrag A, Siddiqui UF, Anastasiou Z, Weintraub D, Schott JM. Clinical variables and biomarkers in prediction of cognitive impairment in patients with newly diagnosed Parkinson's disease: a cohort study. *Lancet Neurol*. 2017; 16:66–75.  
[https://doi.org/10.1016/S1474-4422\(16\)30328-3](https://doi.org/10.1016/S1474-4422(16)30328-3)  
PMID:[27866858](https://pubmed.ncbi.nlm.nih.gov/27866858/)
13. Abdelnour C, van Steenoven I, Londos E, Blanc F, Auestad B, Kramberger MG, Zetterberg H, Mollenhauer B, Boada M, Aarsland D, and European DLB Consortium. Alzheimer's disease cerebrospinal fluid biomarkers predict cognitive decline in lewy body dementia. *Mov Disord*. 2016; 31:1203–8.  
<https://doi.org/10.1002/mds.26668> PMID:[27296778](https://pubmed.ncbi.nlm.nih.gov/27296778/)
14. Collier TJ, Kanaan NM, Kordower JH. Aging and Parkinson's disease: Different sides of the same coin? *Mov Disord*. 2017; 32:983–90.  
<https://doi.org/10.1002/mds.27037> PMID:[28520211](https://pubmed.ncbi.nlm.nih.gov/28520211/)
15. Rajput AH, Rajput EF. Octogenarian parkinsonism - Clinicopathological observations. *Parkinsonism Relat Disord*. 2017; 37:50–7.  
<https://doi.org/10.1016/j.parkreldis.2017.01.009>  
PMID:[28109723](https://pubmed.ncbi.nlm.nih.gov/28109723/)
16. Jellinger KA. Very old onset parkinsonism: A clinical-pathological study. *Parkinsonism Relat Disord*. 2018; 57:39–43.  
<https://doi.org/10.1016/j.parkreldis.2018.07.015>  
PMID:[30054179](https://pubmed.ncbi.nlm.nih.gov/30054179/)
17. Mashima K, Ito D, Kameyama M, Osada T, Tabuchi H, Nihei Y, Yoshizaki T, Noguchi E, Tanikawa M, Iizuka T, Date Y, Ogata Y, Nakahara T, et al. Extremely Low Prevalence of Amyloid Positron Emission Tomography Positivity in Parkinson's Disease without Dementia. *Eur Neurol*. 2017; 77:231–7.  
<https://doi.org/10.1159/000464322> PMID:[28285306](https://pubmed.ncbi.nlm.nih.gov/28285306/)
18. Bellomo G, Paolini Paoletti F, Chipi E, Petricciuolo M, Simoni S, Tambasco N, Parnetti L. A/T/(N) Profile in Cerebrospinal Fluid of Parkinson's Disease with/without Cognitive Impairment and Dementia with Lewy Bodies. *Diagnostics (Basel)*. 2020; 10:1015.  
<https://doi.org/10.3390/diagnostics10121015>  
PMID:[33256252](https://pubmed.ncbi.nlm.nih.gov/33256252/)
19. Jack CR Jr, Bennett DA, Blennow K, Carrillo MC, Dunn B, Haeberlein SB, Holtzman DM, Jagust W, Jessen F, Karlawish J, Liu E, Molinuevo JL, Montine T, et al, and Contributors. NIA-AA Research Framework: Toward a biological definition of Alzheimer's disease. *Alzheimers Dement*. 2018; 14:535–62.  
<https://doi.org/10.1016/j.jalz.2018.02.018>  
PMID:[29653606](https://pubmed.ncbi.nlm.nih.gov/29653606/)
20. Sakuma N, Ura C, Miyamae F, Inagaki H, Ito K, Niikawa H, Ijuin M, Okamura T, Sugiyama M, Awata S. Distribution of Mini-Mental State Examination scores among urban community-dwelling older adults in Japan. *Int J Geriatr Psychiatry*. 2017; 32:718–25.  
<https://doi.org/10.1002/gps.4513>  
PMID:[27427308](https://pubmed.ncbi.nlm.nih.gov/27427308/)
21. Pagano G, Ferrara N, Brooks DJ, Pavese N. Age at onset and Parkinson disease phenotype. *Neurology*. 2016; 86:1400–7.  
<https://doi.org/10.1212/WNL.0000000000002461>  
PMID:[26865518](https://pubmed.ncbi.nlm.nih.gov/26865518/)
22. Prange S, Danaila T, Laurencin C, Caire C, Metereau E, Merle H, Broussolle E, Maucourt-Boulch D, Thobois S. Age and time course of long-term motor and nonmotor complications in Parkinson disease. *Neurology*. 2019; 92:e148–60.  
<https://doi.org/10.1212/WNL.0000000000006737>  
PMID:[30541866](https://pubmed.ncbi.nlm.nih.gov/30541866/)
23. Zhao Y, Tudorascu DL, Lopez OL, Cohen AD, Mathis CA, Aizenstein HJ, Price JC, Kuller LH, Kambh MI, DeKosky ST, Klunk WE, Snitz BE. Amyloid  $\beta$  Deposition and Suspected Non-Alzheimer Pathophysiology and Cognitive Decline Patterns for 12 Years in Oldest Old Participants Without Dementia. *JAMA Neurol*. 2018; 75:88–96.  
<https://doi.org/10.1001/jamaneurol.2017.3029>  
PMID:[29114732](https://pubmed.ncbi.nlm.nih.gov/29114732/)
24. Parnetti L, Chipi E, Salvadori N, D'Andrea K, Eusebi P. Prevalence and risk of progression of preclinical Alzheimer's disease stages: a systematic review and meta-analysis. *Alzheimers Res Ther*. 2019; 11:7.  
<https://doi.org/10.1186/s13195-018-0459-7>  
PMID:[30646955](https://pubmed.ncbi.nlm.nih.gov/30646955/)
25. Jansen WJ, Ossenkuppele R, Knol DL, Tijms BM, Scheltens P, Verhey FR, Visser PJ, Aalten P, Aarsland D, Alcolea D, Alexander M, Almdahl IS, Arnold SE, et al, and Amyloid Biomarker Study Group. Prevalence of cerebral amyloid pathology in persons without dementia: a meta-analysis. *JAMA*. 2015; 313:1924–38.  
<https://doi.org/10.1001/jama.2015.4668>  
PMID:[25988462](https://pubmed.ncbi.nlm.nih.gov/25988462/)
26. Iwatsubo T, Iwata A, Suzuki K, Ihara R, Arai H, Ishii K, Senda M, Ito K, Ikeuchi T, Kuwano R, Matsuda H, Sun CK, Beckett LA, et al, Japanese Alzheimer's Disease Neuroimaging Initiative, and Alzheimer's Disease Neuroimaging Initiative. Japanese and North American Alzheimer's Disease Neuroimaging Initiative studies: Harmonization for international trials. *Alzheimers Dement*. 2018; 14:1077–87.  
<https://doi.org/10.1016/j.jalz.2018.03.009>  
PMID:[29753531](https://pubmed.ncbi.nlm.nih.gov/29753531/)
27. Bachhuber T, Katzmarski N, McCarter JF, Loreth D, Tahirovic S, Kamp F, Abou-Ajram C, Nuscher B, Serrano-Pozo A, Müller A, Prinz M, Steiner H, Hyman

- BT, et al. Inhibition of amyloid- $\beta$  plaque formation by  $\alpha$ -synuclein. *Nat Med*. 2015; 21:802–7.  
<https://doi.org/10.1038/nm.3885> PMID:26099047
28. Tsigelny IF, Crews L, Desplats P, Shaked GM, Sharikov Y, Mizuno H, Spencer B, Rockenstein E, Trejo M, Platoshyn O, Yuan JX, Masliah E. Mechanisms of hybrid oligomer formation in the pathogenesis of combined Alzheimer's and Parkinson's diseases. *PLoS One*. 2008; 3:e3135.  
<https://doi.org/10.1371/journal.pone.0003135> PMID:18769546
  29. Bassil F, Brown HJ, Pattabhiraman S, Iwasyk JE, Maghames CM, Meymand ES, Cox TO, Riddle DM, Zhang B, Trojanowski JQ, Lee VM. Amyloid-Beta (A $\beta$ ) Plaques Promote Seeding and Spreading of Alpha-Synuclein and Tau in a Mouse Model of Lewy Body Disorders with A $\beta$  Pathology. *Neuron*. 2020; 105:260–75.e6.  
<https://doi.org/10.1016/j.neuron.2019.10.010> PMID:31759806
  30. Candreva J, Chau E, Rice ME, Kim JR. Interactions between Soluble Species of  $\beta$ -Amyloid and  $\alpha$ -Synuclein Promote Oligomerization while Inhibiting Fibrillization. *Biochemistry*. 2020; 59:425–35.  
<https://doi.org/10.1021/acs.biochem.9b00655> PMID:31854188
  31. Köppen J, Schulze A, Machner L, Wermann M, Eichentopf R, Guthardt M, Hähnel A, Klehm J, Kriegeskorte MC, Hartlage-Rübsamen M, Morawski M, von Hörsten S, Demuth HU, et al. Amyloid-Beta Peptides Trigger Aggregation of Alpha-Synuclein *In Vitro*. *Molecules*. 2020; 25:580.  
<https://doi.org/10.3390/molecules25030580> PMID:32013170
  32. Arima K, Hirai S, Sunohara N, Aoto K, Izumiyama Y, Uéda K, Ikeda K, Kawai M. Cellular co-localization of phosphorylated tau- and NACP/alpha-synuclein-epitopes in lewy bodies in sporadic Parkinson's disease and in dementia with Lewy bodies. *Brain Res*. 1999; 843:53–61.  
[https://doi.org/10.1016/s0006-8993\(99\)01848-x](https://doi.org/10.1016/s0006-8993(99)01848-x) PMID:10528110
  33. Giasson BI, Forman MS, Higuchi M, Golbe LI, Graves CL, Kotzbauer PT, Trojanowski JQ, Lee VM. Initiation and synergistic fibrillization of tau and alpha-synuclein. *Science*. 2003; 300:636–40.  
<https://doi.org/10.1126/science.1082324> PMID:12714745
  34. Duka T, Duka V, Joyce JN, Sidhu A. Alpha-Synuclein contributes to GSK-3 $\beta$ -catalyzed Tau phosphorylation in Parkinson's disease models. *FASEB J*. 2009; 23:2820–30.  
<https://doi.org/10.1096/fj.08-120410> PMID:19369384
  35. Edwards TL, Scott WK, Almonte C, Burt A, Powell EH, Beecham GW, Wang L, Züchner S, Konidari I, Wang G, Singer C, Nahab F, Scott B, et al. Genome-wide association study confirms SNPs in SNCA and the MAPT region as common risk factors for Parkinson disease. *Ann Hum Genet*. 2010; 74:97–109.  
<https://doi.org/10.1111/j.1469-1809.2009.00560.x> PMID:20070850
  36. Haggerty T, Credle J, Rodriguez O, Wills J, Oaks AW, Masliah E, Sidhu A. Hyperphosphorylated Tau in an  $\alpha$ -synuclein-overexpressing transgenic model of Parkinson's disease. *Eur J Neurosci*. 2011; 33:1598–610.  
<https://doi.org/10.1111/j.1460-9568.2011.07660.x> PMID:21453448
  37. Dasari AK, Kaye R, Wi S, Lim KH. Tau Interacts with the C-Terminal Region of  $\alpha$ -Synuclein, Promoting Formation of Toxic Aggregates with Distinct Molecular Conformations. *Biochemistry*. 2019; 58:2814–21.  
<https://doi.org/10.1021/acs.biochem.9b00215> PMID:31132261
  38. Pan L, Li C, Meng L, Tian Y, He M, Yuan X, Zhang G, Zhang Z, Xiong J, Chen G, Zhang Z. Tau accelerates  $\alpha$ -synuclein aggregation and spreading in Parkinson's disease. *Brain*. 2022; 145:3454–71.  
<https://doi.org/10.1093/brain/awac171> PMID:35552614
  39. Virgilio E, De Marchi F, Contaldi E, Diansani U, Cantello R, Mazzini L, Comi C. The Role of Tau beyond Alzheimer's Disease: A Narrative Review. *Biomedicines*. 2022; 10:760.  
<https://doi.org/10.3390/biomedicines10040760> PMID:35453510
  40. Crary JF, Trojanowski JQ, Schneider JA, Abisambra JF, Abner EL, Alafuzoff I, Arnold SE, Attems J, Beach TG, Bigio EH, Cairns NJ, Dickson DW, Gearing M, et al. Primary age-related tauopathy (PART): a common pathology associated with human aging. *Acta Neuropathol*. 2014; 128:755–66.  
<https://doi.org/10.1007/s00401-014-1349-0> PMID:25348064
  41. Kovacs GG, Alafuzoff I, Al-Sarraj S, Arzberger T, Bogdanovic N, Capellari S, Ferrer I, Gelpi E, Kövari V, Kretschmar H, Nagy Z, Parchi P, Seilhean D, et al. Mixed brain pathologies in dementia: the BrainNet Europe consortium experience. *Dement Geriatr Cogn Disord*. 2008; 26:343–50.  
<https://doi.org/10.1159/000161560> PMID:18849605
  42. Bateman RJ, Xiong C, Benzinger TL, Fagan AM, Goate A, Fox NC, Marcus DS, Cairns NJ, Xie X, Blazey TM, Holtzman DM, Santacruz A, Buckles V, et al, and Dominantly Inherited Alzheimer Network. Clinical and biomarker changes in dominantly inherited Alzheimer's disease. *N Engl J Med*. 2012; 367:795–804.

<https://doi.org/10.1056/NEJMoa1202753>

PMID:22784036

43. Toledo JB, Xie SX, Trojanowski JQ, Shaw LM. Longitudinal change in CSF Tau and A $\beta$  biomarkers for up to 48 months in ADNI. *Acta Neuropathol.* 2013; 126:659–70.  
<https://doi.org/10.1007/s00401-013-1151-4>  
PMID:23812320
44. Guo JL, Covell DJ, Daniels JP, Iba M, Stieber A, Zhang B, Riddle DM, Kwong LK, Xu Y, Trojanowski JQ, Lee VM. Distinct  $\alpha$ -synuclein strains differentially promote tau inclusions in neurons. *Cell.* 2013; 154:103–17.  
<https://doi.org/10.1016/j.cell.2013.05.057>  
PMID:23827677
45. Jellinger KA. Mild cognitive impairment in Parkinson's disease: current view. *Front Cogn. Frontiers Media SA;* 2024; 3.  
<https://www.frontiersin.org/journals/cognition/article/s/10.3389/fcogn.2024.1369538/full>
46. Jellinger KA. Pathobiology of Cognitive Impairment in Parkinson Disease: Challenges and Outlooks. *Int J Mol Sci.* 2023; 25:498.  
<https://doi.org/10.3390/ijms25010498>  
PMID:38203667
47. Yu RL, Wu RM. Mild cognitive impairment in patients with Parkinson's disease: An updated mini-review and future outlook. *Front Aging Neurosci.* 2022; 14:943438.  
<https://doi.org/10.3389/fnagi.2022.943438>  
PMID:36147702
48. Knox MG, Adler CH, Shill HA, Driver-Dunckley E, Mehta SA, Belden C, Zamrini E, Serrano G, Sabbagh MN, Caviness JN, Sue LI, Davis KJ, Dugger BN, Beach TG. Neuropathological Findings in Parkinson's Disease With Mild Cognitive Impairment. *Mov Disord.* 2020; 35:845–50.  
<https://doi.org/10.1002/mds.27991> PMID:32034933
49. Génier Marchand D, Postuma RB, Escudier F, De Roy J, Pelletier A, Montplaisir J, Gagnon JF. How does dementia with Lewy bodies start? prodromal cognitive changes in REM sleep behavior disorder. *Ann Neurol.* 2018; 83:1016–26.  
<https://doi.org/10.1002/ana.25239> PMID:29665124
50. Fengler S, Liepelt-Scarfone I, Brockmann K, Schäffer E, Berg D, Kalbe E. Cognitive changes in prodromal Parkinson's disease: A review. *Mov Disord.* 2017; 32:1655–66.  
<https://doi.org/10.1002/mds.27135>  
PMID:28980730
51. Kurihara M, Matsubara T, Morimoto S, Arakawa A, Ohse K, Kanemaru K, Iwata A, Murayama S, Saito Y. Neuropathological changes associated with aberrant cerebrospinal fluid p-tau181 and A $\beta$ 42 in Alzheimer's disease and other neurodegenerative diseases. *Acta Neuropathol Commun.* 2024; 12:48.  
<https://doi.org/10.1186/s40478-024-01758-3>  
PMID:38539238
52. Morimoto S, Takao M, Hatsuta H, Nishina Y, Komiya T, Sengoku R, Nakano Y, Uchino A, Sumikura H, Saito Y, Kanemaru K, Murayama S. Homovanillic acid and 5-hydroxyindole acetic acid as biomarkers for dementia with Lewy bodies and coincident Alzheimer's disease: An autopsy-confirmed study. *PLoS One.* 2017; 12:e0171524.  
<https://doi.org/10.1371/journal.pone.0171524>  
PMID:28166276
53. Jack CR Jr, Andrews JS, Beach TG, Buracchio T, Dunn B, Graf A, Hansson O, Ho C, Jagust W, McDade E, Molinuevo JL, Okonkwo OC, Pani L, et al. Revised criteria for diagnosis and staging of Alzheimer's disease: Alzheimer's Association Workgroup. *Alzheimers Dement.* 2024; 20:5143–69.  
<https://doi.org/10.1002/alz.13859> PMID:38934362
54. Wisch JK, Gordon BA, Boerwinkle AH, Luckett PH, Bollinger JG, Ovod V, Li Y, Henson RL, West T, Meyer MR, Kirmess KM, Benzinger TL, Fagan AM, et al. Predicting continuous amyloid PET values with CSF and plasma A $\beta$ 42/A $\beta$ 40. *Alzheimers Dement (Amst).* 2023; 15:e12405.  
<https://doi.org/10.1002/dad2.12405> PMID:36874595
55. Baldeiras I, Santana I, Leitão MJ, Gens H, Pascoal R, Tábuas-Pereira M, Beato-Coelho J, Duro D, Almeida MR, Oliveira CR. Addition of the A $\beta$ 42/40 ratio to the cerebrospinal fluid biomarker profile increases the predictive value for underlying Alzheimer's disease dementia in mild cognitive impairment. *Alzheimers Res Ther.* 2018; 10:33.  
<https://doi.org/10.1186/s13195-018-0362-2>  
PMID:29558986
56. Barnes LL, Leurgans S, Aggarwal NT, Shah RC, Arvanitakis Z, James BD, Buchman AS, Bennett DA, Schneider JA. Mixed pathology is more likely in black than white decedents with Alzheimer dementia. *Neurology.* 2015; 85:528–34.  
<https://doi.org/10.1212/WNL.0000000000001834>  
PMID:26180136
57. Kurihara M, Satoh K, Shimasaki R, Hatano K, Ohse K, Taira K, Ihara R, Higashihara M, Nishina Y, Kameyama M, Iwata A.  $\alpha$ -synuclein seed amplification assay sensitivity may be associated with cardiac MIBG abnormality among patients with Lewy body disease. *NPJ Parkinsons Dis.* 2024; 10:190.  
<https://doi.org/10.1038/s41531-024-00806-y>  
PMID:39433540
58. Fairfoul G, McGuire LI, Pal S, Ironside JW, Neumann J, Christie S, Joachim C, Esiri M, Evetts SG, Rolinski M,



- Baig F, Ruffmann C, Wade-Martins R, et al. Alpha-synuclein RT-QuIC in the CSF of patients with alpha-synucleinopathies. *Ann Clin Transl Neurol*. 2016; 3:812–8.  
<https://doi.org/10.1002/acn3.338> PMID:27752516
59. Okuzumi A, Hatano T, Matsumoto G, Nojiri S, Ueno SI, Imamichi-Tatano Y, Kimura H, Kakuta S, Kondo A, Fukuhara T, Li Y, Funayama M, Saiki S, et al. Propagative  $\alpha$ -synuclein seeds as serum biomarkers for synucleinopathies. *Nat Med*. 2023; 29:1448–55.  
<https://doi.org/10.1038/s41591-023-02358-9> PMID:37248302
  60. Pascoal TA, Shin M, Kang MS, Chamoun M, Chartrand D, Mathotaarachchi S, Bennacef I, Therriault J, Ng KP, Hopewell R, Bouhachi R, Hsiao HH, Benedet AL, et al. *In vivo* quantification of neurofibrillary tangles with [ $^{18}$ F]MK-6240. *Alzheimers Res Ther*. 2018; 10:74.  
<https://doi.org/10.1186/s13195-018-0402-y> PMID:30064520
  61. Gibb WR, Lees AJ. The relevance of the Lewy body to the pathogenesis of idiopathic Parkinson's disease. *J Neurol Neurosurg Psychiatry*. 1988; 51:745–52.  
<https://doi.org/10.1136/jnnp.51.6.745> PMID:2841426
  62. American Psychiatric Association. Diagnostic and Statistical Manual of Mental Disorders, Fifth Edition:DSM-5. VA:American Psychiatric Association; 2013.
  63. Kadoguchi N, Okabe S, Yamamura Y, Shono M, Fukano T, Tanabe A, Yokoyama H, Kasahara J. Mirtazapine has a therapeutic potency in 1-methyl-4-phenyl-1,2,3,6-tetrahydropyridine (MPTP)-induced mice model of Parkinson's disease. *BMC Neurosci*. 2014; 15:79.  
<https://doi.org/10.1186/1471-2202-15-79> PMID:24965042
  64. Greenberg SM, Charidimou A. Diagnosis of Cerebral Amyloid Angiopathy: Evolution of the Boston Criteria. *Stroke*. 2018; 49:491–7.  
<https://doi.org/10.1161/STROKEAHA.117.016990> PMID:29335334
  65. Goetz CG, Poewe W, Rascol O, Sampaio C, Stebbins GT, Counsell C, Giladi N, Holloway RG, Moore CG, Wenning GK, Yahr MD, Seidl L, and Movement Disorder Society Task Force on Rating Scales for Parkinson's Disease. Movement Disorder Society Task Force report on the Hoehn and Yahr staging scale: status and recommendations. *Mov Disord*. 2004; 19:1020–8.  
<https://doi.org/10.1002/mds.20213> PMID:15372591
  66. Miyamoto T, Miyamoto M, Iwanami M, Kobayashi M, Nakamura M, Inoue Y, Ando C, Hirata K. The REM sleep behavior disorder screening questionnaire: validation study of a Japanese version. *Sleep Med*. 2009; 10:1151–4.  
<https://doi.org/10.1016/j.sleep.2009.05.007> PMID:19604719
  67. Saito S, Ayabe-Kanamura S, Takashima Y, Gotow N, Naito N, Nozawa T, Mise M, Deguchi Y, Kobayakawa T. Development of a smell identification test using a novel stick-type odor presentation kit. *Chem Senses*. 2006; 31:379–91.  
<https://doi.org/10.1093/chemse/bjj042> PMID:16527871
  68. Sengoku R, Matsushima S, Bono K, Sakuta K, Yamazaki M, Miyagawa S, Komatsu T, Mitsumura H, Kono Y, Kamiyama T, Ito K, Mochio S, Iguchi Y. Olfactory function combined with morphology distinguishes Parkinson's disease. *Parkinsonism Relat Disord*. 2015; 21:771–7.  
<https://doi.org/10.1016/j.parkreldis.2015.05.001> PMID:25986741
  69. Umeda-Kameyama Y, Ishii S, Kameyama M, Kondo K, Ochi A, Yamasoba T, Ogawa S, Akishita M. Heterogeneity of odorant identification impairment in patients with Alzheimer's Disease. *Sci Rep*. 2017; 7:4798.  
<https://doi.org/10.1038/s41598-017-05201-7> PMID:28684764
  70. Goto R, Kurihara M, Kameyama M, Komatsu H, Higashino M, Hatano K, Ihara R, Higashihara M, Nishina Y, Matsubara T, Kanemaru K, Saito Y, Murayama S, Iwata A. Correlations between cerebrospinal fluid homovanillic acid and dopamine transporter SPECT in degenerative parkinsonian syndromes. *J Neural Transm (Vienna)*. 2023; 130:513–20.  
<https://doi.org/10.1007/s00702-023-02611-y> PMID:36871130
  71. Matsuda H, Murata M, Mukai Y, Sako K, Ono H, Toyama H, Inui Y, Taki Y, Shimomura H, Nagayama H, Tateno A, Ono K, Murakami H, et al. Japanese multicenter database of healthy controls for [ $^{123}$ I]FP-CIT SPECT. *Eur J Nucl Med Mol Imaging*. 2018; 45:1405–16.  
<https://doi.org/10.1007/s00259-018-3976-5> PMID:29478082
  72. Matsubara T, Kameyama M, Tanaka N, Sengoku R, Orita M, Furuta K, Iwata A, Arai T, Maruyama H, Saito Y, Murayama S. Autopsy Validation of the Diagnostic Accuracy of  $^{123}$ I-Metaiodobenzylguanidine Myocardial Scintigraphy for Lewy Body Disease. *Neurology*. 2022; 98:e1648–59.  
<https://doi.org/10.1212/WNL.0000000000200110> PMID:35256483
  73. Nakajima K, Nakata T. Cardiac  $^{123}$ I-MIBG Imaging for Clinical Decision Making: 22-Year Experience in Japan. *J Nucl Med*. 2015; 56 Suppl 4:11S–19S.  
<https://doi.org/10.2967/jnumed.114.142794> PMID:26033897



74. Nakajima K, Matsumoto N, Kasai T, Matsuo S, Kiso K, Okuda K. Normal values and standardization of parameters in nuclear cardiology: Japanese Society of Nuclear Medicine working group database. *Ann Nucl Med*. 2016; 30:188–99.  
<https://doi.org/10.1007/s12149-016-1065-z>  
PMID:[26897008](https://pubmed.ncbi.nlm.nih.gov/26897008/)
75. Kanemaru K, Kameda N, Yamanouchi H. Decreased CSF amyloid beta42 and normal tau levels in dementia with Lewy bodies. *Neurology*. 2000; 54:1875–6.  
<https://doi.org/10.1212/wnl.54.9.1875>  
PMID:[10802808](https://pubmed.ncbi.nlm.nih.gov/10802808/)
76. Kurihara M, Komatsu H, Sengoku R, Shibukawa M, Morimoto S, Matsubara T, Arakawa A, Orita M, Ishibashi K, Mitsutake A, Shibata S, Ishiura H, Adachi K, et al. CSF P-Tau181 and Other Biomarkers in Patients With Neuronal Intranuclear Inclusion Disease. *Neurology*. 2023; 100:e1009–19.  
<https://doi.org/10.1212/WNL.0000000000201647>  
PMID:[36517236](https://pubmed.ncbi.nlm.nih.gov/36517236/)
77. Kanda Y. Investigation of the freely available easy-to-use software 'EZR' for medical statistics. *Bone Marrow Transplant*. 2013; 48:452–8.  
<https://doi.org/10.1038/bmt.2012.244>  
PMID:[23208313](https://pubmed.ncbi.nlm.nih.gov/23208313/)

## SUPPLEMENTARY MATERIALS

### Supplementary Figure

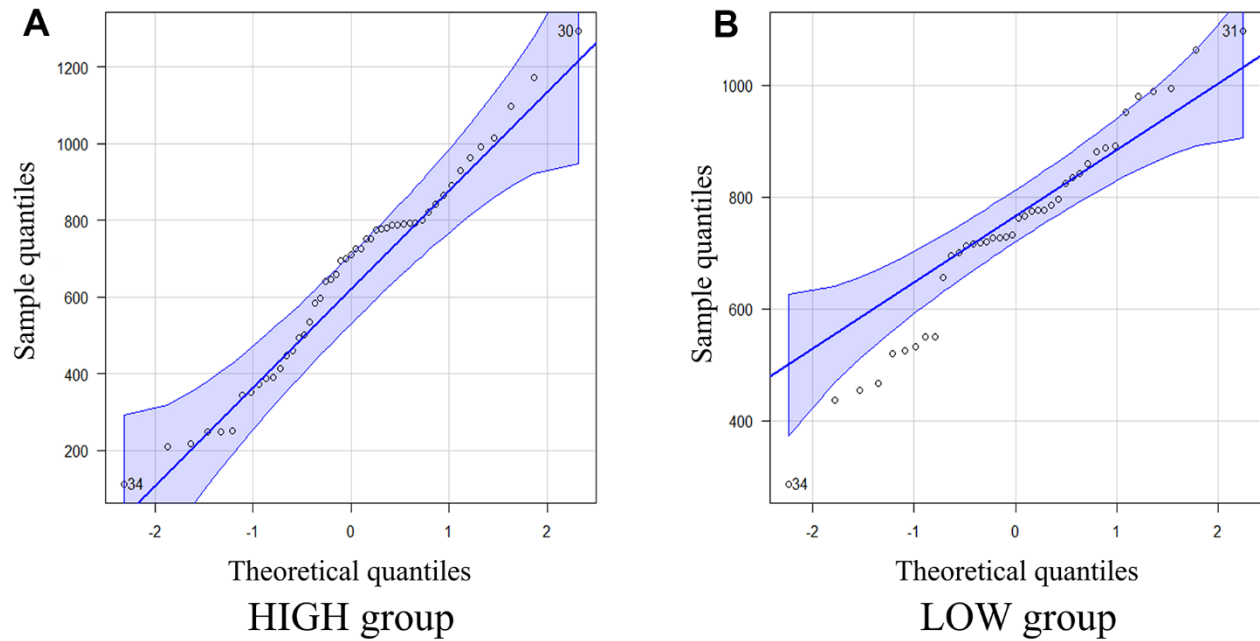

**Supplementary Figure 1. Quantile-quantile plots of Aβ42 levels.** Quantile-quantile plots of Aβ42 levels in HIGH group (A) and LOW group (B) showed approximately normal distribution. HIGH group = patients aged  $\geq 73$  at diagnosis, LOW group = patients aged  $< 73$  at diagnosis, Aβ42 = amyloid-beta 42.

## Supplementary Tables

**Supplementary Table 1A. Distribution of MCI accompanied by clinical data in each AT(N) biomarker category.**

| AT(N) biomarker categories | Group | Normal        | p-value | AD continuum  | p-value | Non-AD pathologic change | p-value | Number of missing data |              |                          |
|----------------------------|-------|---------------|---------|---------------|---------|--------------------------|---------|------------------------|--------------|--------------------------|
|                            |       |               |         |               |         |                          |         | Normal                 | AD continuum | Non-AD pathologic change |
| Number in each group       | HIGH  | n = 30        |         | n = 15        |         | n = 4                    |         |                        |              |                          |
|                            | LOW   | n = 32        |         | n = 4         |         | n = 4                    |         |                        |              |                          |
| Age at diagnosis           | HIGH  | 79.6 (± 3.8)  |         | 81.3 (± 5.4)  |         | 80.8 (± 3.8)             |         | 0                      | 0            | 0                        |
|                            | LOW   | 64.7 (± 7.2)  |         | 64.3 (± 9.4)  |         | 67.0 (± 3.8)             |         | 0                      | 0            | 0                        |
| Disease duration (m)       | HIGH  | 21.1 (± 14.1) |         | 15.2 (± 13.1) |         | 6.5 (± 3.5)              |         | 0                      | 0            | 0                        |
|                            | LOW   | 23.6 (± 14.8) |         | 13.3 (± 13.2) |         | 7.8 (± 6.0)              |         | 0                      | 0            | 0                        |
| Education (y)              | HIGH  | 11.6 (± 2.7)  | 0.001** | 12.1 (± 2.7)  | 0.48    | 11.5 (± 4.5)             | 0.81    | 7                      | 4            | 2                        |
|                            | LOW   | 14.5 (± 2.7)  |         | 13.3 (± 1.9)  |         | 13.0 (± 5.3)             |         | 11                     | 1            | 0                        |
| MMSE scores                | HIGH  | 26.8 (± 2.0)  | 0.003** | 27.6 (± 1.9)  | 0.86    | 27.7 (± 1.2)             | 0.96    | 4                      | 3            | 1                        |
|                            | LOW   | 28.4 (± 1.7)  |         | 27.3 (± 1.7)  |         | 27.8 (± 2.3)             |         | 7                      | 1            | 0                        |
| MCI, n (%)                 | HIGH  | 3 (10.0%)     |         | 1 (6.7%)      |         | 0                        |         | 0                      | 0            | 0                        |
|                            | LOW   | 1 (3.1%)      |         | 0             |         | 1 (25.0%)                |         | 0                      | 0            | 0                        |
| ApoE ε4, n (%)             | HIGH  | 4 (13.8%)     |         | 6 (42.9%)     |         | 0                        |         | 1                      | 1            | 1                        |
|                            | LOW   | 4 (14.2%)     |         | 1 (25.0%)     |         | 0                        |         | 4                      | 0            | 1                        |

Continuous variables are presented as the mean (± standard deviation). AD continuum = Alzheimer's continuum, Non-AD pathologic change = Non-Alzheimer's pathologic change, HIGH = a group of patients aged ≥ 73 at diagnosis, LOW = a group of patients aged < 73 at diagnosis, MMSE = mini-mental state examination, MCI = mild cognitive impairment, ApoE = Apolipoprotein E, Aβ42 = amyloid-beta 42, p-tau = phosphorylated tau, t-tau = total tau, \*\* =  $p < 0.01$ . P-values represent the result of Welch's t test comparing the HIGH group vs. the LOW group within each AT(N) category.

**Supplementary Table 1B. Contingency table for Fisher's exact test showing the numbers of MCI in each AT(N) category within the HIGH group.**

|                  | Normal | AD continuum | Non-AD pathologic change | Total |
|------------------|--------|--------------|--------------------------|-------|
| MCI              | 3      | 1            | 0                        | 4     |
| Normal cognition | 27     | 14           | 4                        | 45    |
| Total            | 30     | 15           | 4                        | 49    |

MCI = mild cognitive impairment, HIGH group = a group of patients aged ≥ 73 at diagnosis, AD continuum = Alzheimer's continuum, Non-AD pathologic change = Non-Alzheimer's pathologic change.

**Supplementary Table 1C. Contingency table for Fisher's exact test showing the numbers of MCI in each AT(N) category within the LOW group.**

|                  | Normal | AD continuum | Non-AD pathologic change | Total |
|------------------|--------|--------------|--------------------------|-------|
| MCI              | 1      | 0            | 1                        | 2     |
| Normal cognition | 31     | 4            | 3                        | 38    |
| Total            | 32     | 4            | 4                        | 40    |

MCI = mild cognitive impairment, LOW group = a group of patients aged < 73 at diagnosis, AD continuum = Alzheimer's continuum, Non-AD pathologic change = Non-Alzheimer's pathologic change.

**Supplementary Table 2. Cutoff levels of CSF amyloid-beta 42 in prior studies using INNOTEST® and our study.**

| No. | CSF A $\beta$ 42 cutoff (pg/mL) | Study         | References |
|-----|---------------------------------|---------------|------------|
| 1   | 333                             | J-ADNI        | 26         |
| 2   | 380                             | Krakow        | 25         |
| 3   | 430                             | Brussels      | 25         |
| 4   | 445                             | Lisbon        | 25         |
| 5   | 450                             | Bremen        | 25         |
| 6   | 450                             | Gothenburg    | 25         |
| 7   | 450                             | Ljubljana     | 25         |
| 8   | 450                             | Mannheim      | 25         |
| 9   | 450                             | Thessaloniki  | 25         |
| 10  | 459                             | St. Louis     | 25         |
| 11  | 482                             | Mattsson      | 25         |
| 12  | 490                             | Athens        | 25         |
| 13  | 500                             | Barcelona CUH | 25         |
| 14  | 500                             | Brescia       | 25         |
| 15  | 500                             | Nijmegen      | 25         |
| 16  | 500                             |               | This study |
| 17  | 542                             | Coimbra       | 25         |
| 18  | 550                             | Amsterdam     | 25         |
| 19  | 550                             | Barcelona HSP | 25         |
| 20  | 550                             | DESCRIPA      | 25         |
| 21  | 550                             | Lausanne      | 25         |
| 22  | 550                             | LeARN         | 25         |
| 23  | 550                             | Lorenskog     | 25         |
| 24  | 550                             | Madrid        | 25         |
| 25  | 550                             | Perugia       | 25         |
| 26  | 550                             | Stockholm     | 25         |
| 27  | 600                             | DCN           | 25         |
| 28  | 600                             | Scinawa       | 25         |
| 29  | 610                             | Warsaw        | 25         |
| 30  | 638.5                           | Antwerp       | 25         |
| 31  | 662.65                          | Chandigarh    | 25         |

Median (IQR) cutoff level: 530.3 (452.3-550.0)

Of the 31 cutoff levels, 30 were taken from prior studies cited in Table 3 (29 from Reference [25] and one from Reference [26]), and the remaining one was our own. These levels ranged from 333 to 662.65 pg/mL. CSF = cerebrospinal fluid, No.= Number, A $\beta$ 42 = amyloid-beta 42, J-ADNI = Japanese Alzheimer's Disease Neuroimaging Initiative, IQR = interquartile range. See the original paper about study names.

**Supplementary Table 3A. Comparison of the prevalence of amyloid positivity between the two groups at a cutoff level of 400 pg/mL.**

|                           | <b>HIGH group</b> | <b>LOW group</b> | <b>Odds ratio</b> | <b>95% CI</b> | <b>p-value</b> |
|---------------------------|-------------------|------------------|-------------------|---------------|----------------|
|                           | <b>(N = 49)</b>   | <b>(N = 40)</b>  |                   |               |                |
| Amyloid positivity, n (%) | 11 (22.4%)        | 1 (2.5%)         | 11.1              | 1.5–496.9     | 0.01**         |

HIGH group = patients aged  $\geq 73$  at diagnosis, LOW group = patients aged  $< 73$  at diagnosis, CI = confidence interval, \*\* =  $p < 0.01$ . *P*-value represents the result of Fisher's exact test.

**Supplementary Table 3B. Comparison of the prevalence of amyloid positivity between the two groups at a cutoff level of 600 pg/mL.**

|                           | <b>HIGH group</b> | <b>LOW group</b> | <b>Odds ratio</b> | <b>95% CI</b> | <b>p-value</b> |
|---------------------------|-------------------|------------------|-------------------|---------------|----------------|
|                           | <b>(N = 49)</b>   | <b>(N = 40)</b>  |                   |               |                |
| Amyloid positivity, n (%) | 19 (38.8%)        | 9 (22.5%)        | 2.2               | 0.8–6.3       | 0.11           |

HIGH group = patients aged  $\geq 73$  at diagnosis, LOW group = patients aged  $< 73$  at diagnosis, CI = confidence interval. *P*-value represents the result of Fisher's exact test.
