# Supplementary material for: Age-related trends in amyloid positivity in Parkinson’s disease without dementia
Source: publisher site journal article supplement (doi:10.18632/aging.206297), 2025-08-06
Supplement: Supplementary file [file aging-v17-206297-supplementary-material-SD2.pdf]

## SUPPLEMENTARY TABLES

**Supplementary Table 1A. Distribution of MCI accompanied by clinical data in each AT(N) biomarker category.**

| AT(N) biomarker categories | Group | Normal        | p value | AD continuum  | p value | Non-AD pathologic change | p value | Number of missing data |              |                          |
|----------------------------|-------|---------------|---------|---------------|---------|--------------------------|---------|------------------------|--------------|--------------------------|
|                            |       |               |         |               |         |                          |         | Normal                 | AD continuum | Non-AD pathologic change |
| Number in each group       | HIGH  | n = 30        |         | n = 15        |         | n = 4                    |         |                        |              |                          |
|                            | LOW   | n = 32        |         | n = 4         |         | n = 4                    |         |                        |              |                          |
| Age at diagnosis           | HIGH  | 79.6 (± 3.8)  |         | 81.3 (± 5.4)  |         | 80.8 (± 3.8)             |         | 0                      | 0            | 0                        |
|                            | LOW   | 64.7 (± 7.2)  |         | 64.3 (± 9.4)  |         | 67.0 (± 3.8)             |         | 0                      | 0            | 0                        |
| Disease duration (m)       | HIGH  | 21.1 (± 14.1) |         | 15.2 (± 13.1) |         | 6.5 (± 3.5)              |         | 0                      | 0            | 0                        |
|                            | LOW   | 23.6 (± 14.8) |         | 13.3 (± 13.2) |         | 7.8 (± 6.0)              |         | 0                      | 0            | 0                        |
| Education (y)              | HIGH  | 11.6 (± 2.7)  | 0.001** | 12.1 (± 2.7)  | 0.48    | 11.5 (± 4.5)             | 0.81    | 7                      | 4            | 2                        |
|                            | LOW   | 14.5 (± 2.7)  |         | 13.3 (± 1.9)  |         | 13.0 (± 5.3)             |         | 11                     | 1            | 0                        |
| MMSE scores                | HIGH  | 26.8 (± 2.0)  | 0.003** | 27.6 (± 1.9)  | 0.86    | 27.7 (± 1.2)             | 0.96    | 4                      | 3            | 1                        |
|                            | LOW   | 28.4 (± 1.7)  |         | 27.3 (± 1.7)  |         | 27.8 (± 2.3)             |         | 7                      | 1            | 0                        |
| MCI, n (%)                 | HIGH  | 3 (10.0%)     |         | 1 (6.7%)      |         | 0                        |         | 0                      | 0            | 0                        |
|                            | LOW   | 1 (3.1%)      |         | 0             |         | 1 (25.0%)                |         | 0                      | 0            | 0                        |
| ApoE ε4, n (%)             | HIGH  | 4 (13.8%)     |         | 6 (42.9%)     |         | 0                        |         | 1                      | 1            | 1                        |
|                            | LOW   | 4 (14.2%)     |         | 1 (25.0%)     |         | 0                        |         | 4                      | 0            | 1                        |

Continuous variables are presented as the mean (± standard deviation). AD continuum = Alzheimer's continuum, Non-AD pathologic change = Non-Alzheimer's pathologic change, HIGH = a group of patients aged ≥ 73 at diagnosis, LOW = a group of patients aged < 73 at diagnosis, MMSE = mini-mental state examination, MCI = mild cognitive impairment, ApoE = Apolipoprotein E, Aβ42 = amyloid-beta 42, p-tau = phosphorylated tau, t-tau = total tau, \*\* =  $p < 0.01$ . *P* values represent the result of Welch's t test comparing the HIGH group vs. the LOW group within each AT(N) category.

**Supplementary Table 1B. Contingency table for Fisher's exact test showing the numbers of MCI in each AT(N) category within the HIGH group.**

|                  | Normal | AD continuum | Non-AD pathologic change | Total |
|------------------|--------|--------------|--------------------------|-------|
| MCI              | 3      | 1            | 0                        | 4     |
| Normal cognition | 27     | 14           | 4                        | 45    |
| Total            | 30     | 15           | 4                        | 49    |

MCI = mild cognitive impairment, HIGH group = a group of patients aged ≥ 73 at diagnosis, AD continuum = Alzheimer's continuum, Non-AD pathologic change = Non-Alzheimer's pathologic change.

**Supplementary Table 1C. Contingency table for Fisher's exact test showing the numbers of MCI in each AT(N) category within the LOW group.**

|                  | Normal | AD continuum | Non-AD pathologic change | Total |
|------------------|--------|--------------|--------------------------|-------|
| MCI              | 1      | 0            | 1                        | 2     |
| Normal cognition | 31     | 4            | 3                        | 38    |
| Total            | 32     | 4            | 4                        | 40    |

MCI = mild cognitive impairment, LOW group = a group of patients aged < 73 at diagnosis, AD continuum = Alzheimer's continuum, Non-AD pathologic change = Non-Alzheimer's pathologic change.

**Supplementary Table 2. Cutoff levels of CSF amyloid-beta 42 in prior studies using INNOTEST® and our study.**

| No. | CSF A $\beta$ 42 cutoff (pg/mL) | Study         | References |
|-----|---------------------------------|---------------|------------|
| 1   | 333                             | J-ADNI        | 26         |
| 2   | 380                             | Krakow        | 25         |
| 3   | 430                             | Brussels      | 25         |
| 4   | 445                             | Lisbon        | 25         |
| 5   | 450                             | Bremen        | 25         |
| 6   | 450                             | Gothenburg    | 25         |
| 7   | 450                             | Ljubljana     | 25         |
| 8   | 450                             | Mannheim      | 25         |
| 9   | 450                             | Thessaloniki  | 25         |
| 10  | 459                             | St. Louis     | 25         |
| 11  | 482                             | Mattsson      | 25         |
| 12  | 490                             | Athens        | 25         |
| 13  | 500                             | Barcelona CUH | 25         |
| 14  | 500                             | Brescia       | 25         |
| 15  | 500                             | Nijmegen      | 25         |
| 16  | 500                             |               | This study |
| 17  | 542                             | Coimbra       | 25         |
| 18  | 550                             | Amsterdam     | 25         |
| 19  | 550                             | Barcelona HSP | 25         |
| 20  | 550                             | DESCRIPA      | 25         |
| 21  | 550                             | Lausanne      | 25         |
| 22  | 550                             | LeARN         | 25         |
| 23  | 550                             | Lorenskog     | 25         |
| 24  | 550                             | Madrid        | 25         |
| 25  | 550                             | Perugia       | 25         |
| 26  | 550                             | Stockholm     | 25         |
| 27  | 600                             | DCN           | 25         |
| 28  | 600                             | Scinawa       | 25         |
| 29  | 610                             | Warsaw        | 25         |
| 30  | 638.5                           | Antwerp       | 25         |
| 31  | 662.65                          | Chandigarh    | 25         |

Median (IQR) cutoff level: 530.3 (452.3-550.0)

Of the 31 cutoff levels, 30 were taken from prior studies cited in Table 3 (29 from Reference [25] and one from Reference [26]), and the remaining one was our own. These levels ranged from 333 to 662.65 pg/mL. CSF = cerebrospinal fluid, No.= Number, A $\beta$ 42 = amyloid-beta 42, J-ADNI = Japanese Alzheimer's Disease Neuroimaging Initiative, IQR = interquartile range. See the original paper about study names.

**Supplementary Table 3A. Comparison of the prevalence of amyloid positivity between the two groups at a cutoff level of 400 pg/mL.**

|                           | <b>HIGH group</b><br>(N = 49) | <b>LOW group</b><br>(N = 40) | <b>Odds ratio</b> | <b>95% CI</b> | <b>p value</b> |
|---------------------------|-------------------------------|------------------------------|-------------------|---------------|----------------|
| Amyloid positivity, n (%) | 11 (22.4%)                    | 1 (2.5%)                     | 11.1              | 1.5–496.9     | 0.01**         |

HIGH group = patients aged  $\geq 73$  at diagnosis, LOW group = patients aged  $< 73$  at diagnosis, CI = confidence interval, \*\* =  $p < 0.01$ . *P* value represents the result of Fisher's exact test.

**Supplementary Table 3B. Comparison of the prevalence of amyloid positivity between the two groups at a cutoff level of 600 pg/mL.**

|                           | <b>HIGH group</b><br>(N = 49) | <b>LOW group</b><br>(N = 40) | <b>Odds ratio</b> | <b>95% CI</b> | <b>p value</b> |
|---------------------------|-------------------------------|------------------------------|-------------------|---------------|----------------|
| Amyloid positivity, n (%) | 19 (38.8%)                    | 9 (22.5%)                    | 2.2               | 0.8–6.3       | 0.11           |

HIGH group = patients aged  $\geq 73$  at diagnosis, LOW group = patients aged  $< 73$  at diagnosis, CI = confidence interval. *P* value represents the result of Fisher's exact test.
